# Supplementary material
Source: Elsevier journal article supplement (http://cercind.gov.in/2014/market_monitoring/MMC12.pdf)
Supplement: MMC12 [file MMC12.pdf]

# Monthly Report on Short-term Transactions of Electricity in India

## December, 2014

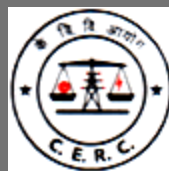

Economics Division  
Central Electricity Regulatory Commission  
3<sup>rd</sup> & 4<sup>th</sup> Floor, Chanderlok Building  
36, Janpath, New Delhi -110001.

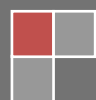

# Contents

| S.No  | Contents                                                                                | Page No |
|-------|-----------------------------------------------------------------------------------------|---------|
|       | Contents                                                                                | 2       |
|       | List of Tables and Figures                                                              | 3       |
|       | Abbreviations                                                                           | 4       |
|       | Introduction                                                                            | 6       |
| I     | Volume of Short-term Transactions of Electricity                                        | 6       |
| II    | Price of Short-term Transactions of Electricity                                         | 7       |
| (i)   | <i>Price of electricity transacted through Traders</i>                                  | 7       |
| (ii)  | <i>Price of electricity transacted Through Power Exchange</i>                           | 7       |
| (iii) | <i>Price of electricity transacted Through UI</i>                                       | 8       |
| III   | Volume of Short-term Transactions of Electricity (Regional Entity-wise)                 | 8       |
| IV    | Congestion on Inter-state Transmission Corridor for Day-Ahead Market on Power Exchanges | 9       |
| V     | Analysis of Bilateral Contracts executed by Traders in January 2015                     | 10      |
| (i)   | <i>Duration of bilateral contracts</i>                                                  | 10      |
| (ii)  | <i>Forward Curve based on Prices of bilateral contracts</i>                             | 10      |
| VI    | Volume and Price of Renewable Energy Certificates (RECs)                                | 11      |
| VII   | Inferences                                                                              | 12      |

## List of Tables and Figures

| S.No.                     | List of Tables and Figures                                                                  | Page No. |
|---------------------------|---------------------------------------------------------------------------------------------|----------|
| <b>I List of Tables</b>   |                                                                                             |          |
| Table-1                   | Volume of Short-term Transactions of Electricity in India                                   | 14       |
| Table-2                   | Percentage Share of Electricity Transacted by Trading Licensees                             | 16       |
| Table-3                   | Price of Electricity Transacted through Traders                                             | 17       |
| Table-4                   | Price of Electricity Transacted through Traders (Time-wise)                                 | 17       |
| Table-5                   | Price of Electricity Transacted through Power Exchanges                                     | 17       |
| Table-6                   | Volume and Price of Electricity in Term Ahead Market of IEX                                 | 17       |
| Table-7                   | Volume and Price of Electricity in Term Ahead Market of PXIL                                | 17       |
| Table-8                   | Price of Electricity Transacted through UI                                                  | 17       |
| Table-9                   | Volume of Electricity Sale through Bilateral                                                | 19       |
| Table-10                  | Volume of Electricity Purchase through Bilateral                                            | 20       |
| Table-11                  | Volume of Electricity Sale through Power Exchanges                                          | 21       |
| Table-12                  | Volume of Electricity Purchase through Power Exchanges                                      | 22       |
| Table-13                  | Volume of Electricity Export through UI                                                     | 23       |
| Table-14                  | Volume of Electricity Import through UI                                                     | 24       |
| Table-15                  | Total Volume of Net Short-term Transactions of Electricity (Regional Entity-wise)           | 25       |
| Table-16                  | Details of Congestion in Power Exchanges                                                    | 27       |
| Table-17                  | Volume of Short-term Transactions of Electricity in India (Day-wise)                        | 28       |
| Table-18                  | Price of Short-term Transactions of Electricity (Day-wise)                                  | 29       |
| Table-19                  | Volume of Short-term Transactions of Electricity (Regional Entity-wise)                     | 30       |
| Table-20                  | Volume and Price of Renewable Energy Certificates (RECs) Transacted through Power Exchanges | 33       |
| <b>II List of Figures</b> |                                                                                             |          |
| Figure-1                  | Volume of Short-term Transactions of Electricity                                            | 14       |
| Figure-2                  | Volume of Various Kinds of Electricity Transactions in Total Electricity Generation         | 14       |
| Figure-3                  | Volume of Short-term Transactions of Electricity (Day-wise)                                 | 15       |
| Figure-4                  | Percentage Share of Electricity Transacted by Trading Licensees                             | 16       |
| Figure-5                  | Price of Short-term Transactions of Electricity                                             | 18       |
| Figure-6                  | Price of Short-term Transactions of Electricity (Day-wise)                                  | 18       |
| Figure-7                  | Bilateral Contracts Executed by Traders in January, 2015                                    | 32       |
| Figure-8                  | Forward Curve based on Prices of Bilateral Contracts                                        | 32       |

## Abbreviations

| Abbreviation     | Expanded Version                                           |
|------------------|------------------------------------------------------------|
| ACBIL            | ACB ( India) Limited                                       |
| ACP              | Area Clearing Price                                        |
| ACV              | Area Clearing Volume                                       |
| AD HYDRO         | AD Hydro Power Limited                                     |
| BALCO            | Bharat Aluminium Company Limited                           |
| CEA              | Central Electricity Authority                              |
| CERC             | Central Electricity Regulatory Commission                  |
| CGPL             | Coastal Gujarat Power Limited                              |
| CHUZACHEN HEP    | Chuzachen Hydro electric power project                     |
| DB Power         | Diligent Power Pvt. Ltd.                                   |
| DCPP             | Donga Mahua Captive Power Plant                            |
| DHARIWAL POWER   | Dhariwal Power Station                                     |
| DVC              | Damodar Valley Corporation                                 |
| EMCO             | EMCO Energy Limited                                        |
| ESSAR STEEL      | Essar Steel Ltd                                            |
| GMR KAMALANGA    | GMR Kamalanga Energy Ltd.                                  |
| IEX              | Indian Energy Exchange Limited                             |
| J&K              | Jammu & Kashmir                                            |
| JAYPEE NIGRIE    | Jaypee Nigrie Super Thermal Power Project                  |
| JINDAL POWER     | Jindal Power Limited                                       |
| JINDAL STAGE-II  | Jindal Power Ltd Stage II                                  |
| JITPL            | Jindal India Thermal Power Ltd.                            |
| KARCHAM WANGTOO  | Jaypee Karcham Hydro Corporation Limited                   |
| KSK MAHANADI     | KSK Mahanadi Power Ltd                                     |
| LANCO BUDHIL     | Lanco Budhil Hydro Power Private Limited                   |
| LANKO_AMK        | Lanco Amarkantak Power Private Limited                     |
| LANKO_KONDAPALLY | Lanco Kondapally Power Private Limited                     |
| MALANA           | Malana Hydroelectric Plant                                 |
| Meenakshi        | Meenakshi Energy Private Limited                           |
| MP               | Madhya Pradesh                                             |
| MUs              | Million Units                                              |
| NEEPCO Stations  | North Eastern Electric Power Corporation Limited. Stations |
| NHPC Stations    | National Hydro Electric Power Corporation Ltd. Stations    |
| NJPC             | Nathpa Jhakri Hydroelectric Power Station                  |
| NLDC             | National Load Despatch Centre                              |
| NSPCL            | NTPC - SAIL Power Company Private Limited                  |
| ONGC PALATANA    | Oil and Natural Gas Corporation, Palatana                  |
| OTC              | Over The Counter                                           |

|                |                                         |
|----------------|-----------------------------------------|
| PX             | Power Exchange                          |
| PXIL           | Power Exchange India Limited            |
| RANGIT HEP     | Rangit Hydro electric power project     |
| REC            | Renewable Energy Certificate            |
| RGPPL          | Ratnagiri Gas and Power Private Limited |
| RLDC           | Regional Load Despatch Centre           |
| RTC            | Round - the- Clock                      |
| SHREE CEMENT   | Shree Cement Limited                    |
| SIMHAPURI      | Simhapuri Energy Private Limited        |
| STERLITE       | Sterlite Energy Limited                 |
| TEESTA HEP     | Teesta Hydro electric power project     |
| UI             | Unscheduled Interchange                 |
| UT             | Union Territory                         |
| VANDANA VIDYUT | Vandana Vidyut Limited                  |

## **Introduction**

A well-functioning electricity market requires an effective market monitoring process. As part of the market monitoring process, the monthly report on short-term transactions of electricity, is being prepared and posted on the website of CERC since August 2008. Here, “short-term transactions of electricity” refers to the contracts of less than one year period, for electricity transacted (inter-state & intra-state) through Inter-State Trading Licensees and directly by the Distribution Licensees, Power Exchanges (Indian Energy Exchange Ltd (IEX) and Power Exchange India Ltd (PXIL)), and Unscheduled Interchange (UI). The objectives of the report are: (i) to observe the trends in volume and price of the short-term transactions of electricity; (ii) to analyse competition among the market players; (iii) to analyse effect of +congestion on volume of electricity transacted through power exchanges; (iv) to analyse bilateral contracts executed by traders; (v) to provide information on volume and price of Renewable Energy Certificates (RECs) transacted through power exchanges; and (vi) to disclose/disseminate all relevant market information. The analysis of the report for the month of December, 2014 is as under:

### **I: Volume of Short-term Transactions of Electricity**

During the month of December 2014, total electricity generation excluding generation from renewable and captive power plants in India was 85994.74 MUs (Table-1).

Of the total electricity generation, 8479.48 MUs (9.86%) were transacted through short-term, comprising of 4652.57 MUs (5.41%) through Bilateral (through traders and term-ahead contracts on Power Exchanges and directly between distribution companies), followed by 2200.06 MUs (2.56%) through day ahead collective transactions on Power Exchanges (IEX and PXIL) and 1626.84 MUs (1.89%) through UI (Table-1 & Figure-2).

Of the total short-term transactions, Bilateral constitute 54.87% (38.97% through traders and term-ahead contracts on Power Exchanges and 15.90% directly between distribution companies) followed by 25.95% through day ahead collective transactions on Power Exchanges and 19.19% through UI (Table-1& Figure-1). Daily volume of short-term transactions is shown in Table-17 & Figure-3.

The percentage share of electricity traded by each trading licensee in the total volume of electricity traded by all trading licensees is provided in Table-2 & Figure-4. The trading licensees undertake electricity transactions through bilateral and through power exchanges. Here, the volume of electricity transacted by the trading licensees includes bilateral transactions and the transactions undertaken through power exchanges. There were 47 trading licensees as on 31.12.2014, of which only 23 have engaged in trading during December 2014. Top 5 trading licensees had a share of 65.35% in the total volume traded by all the licensees.

Herfindahl-Hirschman Index (HHI) has been used for measuring the competition among the trading licensees. Increase in the HHI generally indicates a decrease in competition and an increase of market power, whereas decrease indicates the opposite. A HHI below 0.15 indicates non-concentration, a HHI between 0.15 to 0.25 indicates moderate concentration and a HHI above 0.25 indicates high concentration. The HHI computed for volume of electricity traded by trading licensees (inter-state & intra-state) was 0.1310 for the month of December 2014, which indicates non-concentration of market power (Table-2).

The volume of electricity transacted through IEX and PXIL in the day ahead market was 2168.82 MUs and 31.24 MUs respectively. The volume of total Buy bids and Sale bids was 3176.84 MUs and 3517.25 MUs respectively in IEX and 56.36 MUs and 44.01 MUs respectively in PXIL. The gap between the volume of buy bids and sale bids placed through power exchanges shows that there was lesser demand in IEX (0.90 times) and greater demand in PXIL (1.28 times) when compared with the supply offered through these exchanges.

The volume of electricity transacted through IEX and PXIL in the term-ahead market was 8.99 MUs and 100.29 MUs respectively (Table-6 & Table-7).

## **II: Price of Short-term Transactions of Electricity**

(i) *Price of electricity transacted through Traders:* Weighted average sale price has been computed for the electricity transacted through traders and it was ₹4.33/kWh. Weighted average sale price was also computed for the transactions during Round the Clock (RTC), Peak, and Off-Peak periods separately, and the sale prices were ₹4.37/kWh, ₹4.32/kWh and ₹3.45/kWh respectively. Minimum and Maximum sale prices were ₹1.54/kWh and ₹7.99/kWh respectively (Table-3 & 4).

**(ii) Price of electricity transacted Through Power Exchanges:** Minimum, Maximum and Weighted Average Prices have been computed for the electricity transacted through IEX and PXIL separately. The Minimum, Maximum and Weighted Average prices were ₹1.10/kWh, ₹20/kWh and ₹3.20/kWh respectively in IEX and ₹1.33/kWh, ₹4.87/kWh and ₹2.85/kWh respectively in PXIL (Table-5).

The price of electricity transacted through IEX and PXIL in the term-ahead market was ₹3.79/kWh and ₹3.17/kWh respectively (Table-6 and Table-7).

**(iii) Price of electricity transacted Through UI:** The average UI price was ₹1.84/kWh for all India grid. Minimum and Maximum UI prices were ₹0.00/kWh and ₹8.24/kWh respectively in the All India Grid.

The prices of electricity transacted through trading licensees, power exchanges and UI and their comparison is shown in Table-18, Figure-5 & 6.

### **III: Volume of Short-term Transactions of Electricity (Regional Entity<sup>1</sup>-Wise)**

Of the total bilateral transactions, top 5 regional entities sold 57.73% of the volume, and these were Haryana, Delhi, Jindal Power Ltd, Punjab and Karnataka. Top 5 regional entities purchased 55.97% of the volume, and these were Rajasthan, Madhya Pradesh, Andhra Pradesh, Himachal Pradesh and Jammu and Kashmir. (Table-9, 10 & 19).

Of the total Power Exchange transactions, top 5 regional entities sold 35.34% of the volume, and these were Donga Mahua Captive Power Plant, Karnataka, Chhattisgarh, Sterlite India Ltd and Maharashtra. Top 5 regional entities purchased 57.08% of the volume, and these were Rajasthan, Uttarakhand, Gujarat, Delhi and Kerala. (Table-11, 12 & 19).

Of the total UI transactions, top 5 regional entities underdrew 48.40% of the volume, and these were Maharashtra, Uttar Pradesh, Haryana, Bihar and Tamilnadu. Top 5 regional entities overdrew 31.35% of the volume, and these were Punjab, Kerala, Jammu and Kashmir, Rajasthan and Orissa. (Table-13, 14 & 19).

---

<sup>1</sup> In case of a state, the entities which are “selling” also include generators connected to state grid and the entities which are “buying” also include open access consumers.



Regional entity-wise total volume of net short-term transactions of electricity i.e. volume of net transactions through bilateral, power exchanges and UI is shown in Table-15 & 19. Top 5 electricity selling regional entities were Haryana, Jindal Power Ltd, Karnataka, Sterlite India Ltd and Delhi. Top 5 electricity purchasing regional entities were Rajasthan, Andhra Pradesh, Jammu and Kashmir, Uttarakhand and Madhya Pradesh.

#### **IV: Congestion<sup>2</sup> on Inter-state Transmission Corridor for Day-Ahead Market on Power Exchanges**

Power Exchanges use a price discovery mechanism in which the aggregate demand and supply are matched to arrive at an unconstrained market price and volume. This step assumes that there is no congestion in the inter-state transmission system between different regions. However, in reality, the system operator, NLDC in coordination with RLDCs, limits the flow due to congestion in the inter-state transmission system. In such a situation, Power Exchanges adopt a mechanism called “Market Splitting”<sup>3</sup>.

In the month of December 2014, congestion occurred in both the power exchanges, the details of which are shown in Table-16. The volume of electricity that could not be cleared due to congestion and could not be transacted through power exchanges is the difference between unconstrained cleared volume (volume of electricity that would have been scheduled, had there been no congestion) and actual cleared volume.

During the month, the volume of electricity that could not be cleared in the power exchanges due to congestion was 6.46% and 5.65% of the unconstrained cleared volume in IEX and PXIL, respectively. In terms of time, congestion occurred was 96.61% in IEX and 19.93% in PXIL.

---

<sup>2</sup> “Congestion” means a situation where the demand for transmission capacity exceeds the available transfer capability

<sup>3</sup> “Market Splitting” is a mechanism adopted by Power Exchange where the market is split in the event of transmission congestion, into predetermined (by NLDC) bid areas or zones, which are cleared individually at their respective area prices such that the energy balance in every bid area is reached based upon the demand and supply in individual bid areas and using the available transmission corridor capacity between various bid areas simultaneously”

As a result of this market splitting the price of electricity in the importing region, where demand for electricity is more than supply, becomes relatively higher than the price of electricity in the exporting region.

## **V: Analysis of Bilateral Contracts executed by Traders in January 2015<sup>4</sup>**

### **(i) *Duration of bilateral contracts:***

During January, 2015, a total of 177 bilateral contracts (excluding banking/swap contracts) have been executed by traders for the volume of 1942 MUs. Figure-7 shows the percentage of contracts categorized according to the period of power supply. It can be observed from the figure that 61% of the contracts were executed for a duration of up to one week, followed by 38.4% of the contracts executed for a duration of more than a week and upto one month and with a small contribution of 0.6% of the contracts executed for a duration more than one month and upto 3 months.

During the same period, 99 banking/swapping bilateral contracts were also executed for the volume of 672 MUs.

### **(ii) *Forward Curve based on price of bilateral contracts:***

A forward curve reflects present day's expectation of prices for a future period. The forward curve of electricity prices are based on sale prices of bilateral contracts executed by traders. For constructing the forward curve, the price of each contract is taken to be price for each day of that contract's period. On the basis of these prices, weighted average price for each day is calculated using various sale prices of contracts for delivery on that particular day.

Figure-8 represents the forward curve of electricity sale prices for the period from February 2015 to May 2016 based on bilateral contracts<sup>5</sup> executed till January, 2015. The forward curve drawn for December 2014 has also been depicted for the period February 2015 onwards for comparison purposes. It is observed that with the execution of new contracts in January 2014, there is a dip in the forward prices for the period from March 2015 to June 2015. However, forward prices remain same for period beyond June 2015.

---

<sup>4</sup> 'Monthly OTC (Electricity Traders) report' based on analysis of weekly reports has been discontinued and Analysis of Bilateral Contracts is being presented in this report hereinafter.

<sup>5</sup> Excluding Banking/Swapping contracts

## **VI: Volume and Price of Renewable Energy Certificates (RECs)**

The concept of Renewable Energy Certificates (RECs) seeks to address mismatch between availability of renewable energy sources and the requirement of the obligated entities to meet their renewable purchase obligation by purchasing green attributes of renewable energy remotely located in the form of RECs. The REC mechanism is a market based instrument, to promote renewable sources of energy and development of market in electricity.

One REC is equivalent to 1 MWh of electricity injected into the grid from renewable energy sources. The REC is exchanged only in the power exchanges approved by CERC within the band of a floor price and forbearance (ceiling) price as notified by CERC from time to time. The first REC trading session was held on power exchanges in March 2011.

The details of REC transactions for the month of December 2014 are shown in Table-20. The market clearing volume of Solar RECs transacted on IEX and PXIL were 366 and 1693 respectively and the market clearing price of these RECs was ₹9300/MWh on both the power exchanges. Market clearing volume of Non-Solar RECs transacted on IEX and PXIL were 177960 and 157763 respectively and the market clearing price of these RECs was ₹1500/MWh on both the power exchanges.

The gap between the volume of buy and sell bids of RECs placed through power exchanges show that there was less demand for Solar RECs and Non-Solar RECs. For Solar RECs, the ratio of buy and sell bids was 0.002 and 0.005 for IEX and PXIL respectively. For Non-Solar RECs, the ratio of buy and sell bids was 0.03 for both IEX and PXIL.

## VII: Inferences:

- The percentage of short-term transactions of electricity to total electricity generation was 9.86%.
- Of the total short-term transactions of electricity, 54.87% was transacted through bilateral (through traders and term ahead contracts on power exchanges and directly by distribution companies), followed by 25.95% through Power Exchanges and 19.19% through UI.
- Top 5 trading licensees had a share of 65.35% in the total volume traded by all the trading licensees.
- The Herfindahl Hirschman Index computed for volume of electricity traded by trading licensees was 0.1310, indicating non-concentration of market power.
- The price of electricity transacted through trading licensees was ₹4.33/kWh). The prices of electricity transacted through IEX and PXIL were ₹3.20/kWh and ₹2.85/kWh) respectively.
- The price of electricity transacted through UI was ₹1.84/kWh
- The gap between the volume of buy bids and sale bids placed through power exchanges indicates that there was less demand in IEX (1: 0.90) and more demand in PXIL (1: 1.28) when compared with the supply offered through these exchanges.
- Top 5 electricity selling regional entities were Haryana, Jindal Power Ltd, Karnataka, Sterlite India Ltd and Delhi. Top 5 electricity purchasing regional entities were Rajasthan, Andhra Pradesh, Jammu and Kashmir, Uttarakhand and Madhya Pradesh.
- The volume of electricity that could not be cleared in the power exchanges due to congestion was 6.46% and 5.65% of the unconstrained cleared volume in IEX and PXIL, respectively. In terms of time, congestion occurred was 96.61% in IEX and 19.93% in PXIL.
- In January 2015, 61.0% of the bilateral contracts (excluding banking/swapping) were executed for a duration of up to one week, followed by 38.4% of the contracts were

executed for a duration of more than a week and upto one month and 0.6% of the contracts were executed for a duration of more than one month and upto three months.

- The forward prices from March, 2015 to June 2015 are lower because contracts executed in January 2015 were at lower prices when compared to contracts executed till December 2014. However, forward prices remain same for the period beyond June 2015.
- The market clearing volume of Solar RECs transacted on IEX and PXIL were 366 and 1693 respectively and the market clearing price of these RECs was ₹9300/MWh on both the power exchanges. Market clearing volume of Non-Solar RECs transacted on IEX and PXIL were 177960 and 157763 respectively and the market clearing price of these RECs was ₹1500/MWh on both the power exchanges.

| Table-1: VOLUME OF SHORT-TERM TRANSACTIONS OF ELECTRICITY (ALL INDIA), DECEMBER 2014 |                             |                 |                                        |                       |
|--------------------------------------------------------------------------------------|-----------------------------|-----------------|----------------------------------------|-----------------------|
| Sr.No                                                                                | Short-term transactions     | Volume (MUs)    | % to Volume of short-term transactions | % to Total Generation |
| 1                                                                                    | Bilateral                   | 4652.57         | 54.87%                                 | 5.41%                 |
|                                                                                      | (i) Through Traders and PXs | 3304.14         | 38.97%                                 | 3.84%                 |
|                                                                                      | (ii) Direct                 | 1348.43         | 15.90%                                 | 1.57%                 |
| 2                                                                                    | Through Power Exchanges     | 2200.06         | 25.95%                                 | 2.56%                 |
|                                                                                      | (i) IEX                     | 2168.82         | 25.58%                                 | 2.52%                 |
|                                                                                      | (ii) PXIL                   | 31.24           | 0.37%                                  | 0.04%                 |
| 3                                                                                    | Through UI                  | 1626.84         | 19.19%                                 | 1.89%                 |
|                                                                                      | <b>Total</b>                | <b>8479.48</b>  | <b>100.00%</b>                         | <b>9.86%</b>          |
|                                                                                      | <b>Total Generation</b>     | <b>85994.74</b> | —                                      | —                     |

Source: NLDC

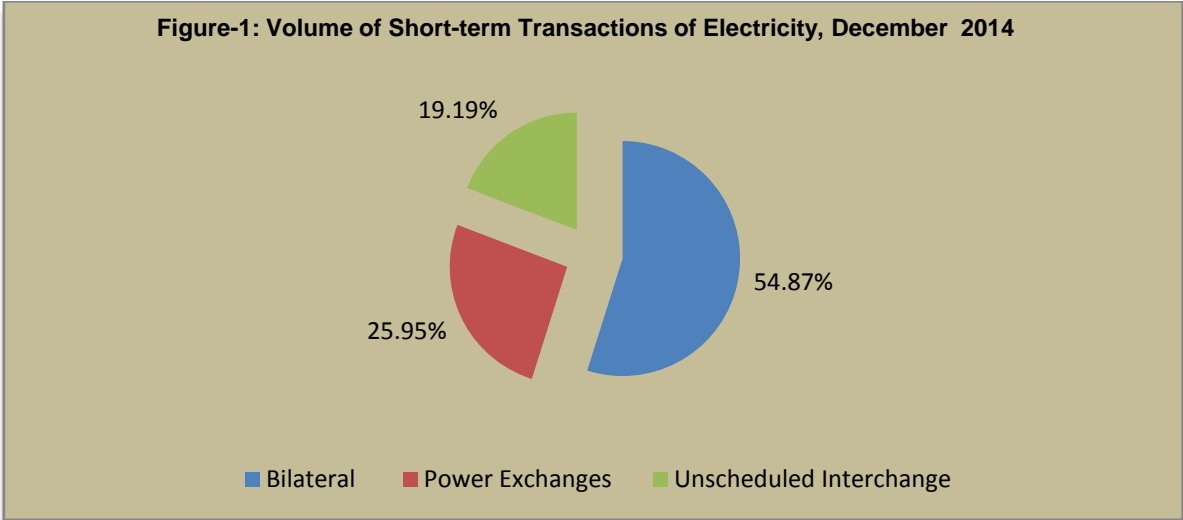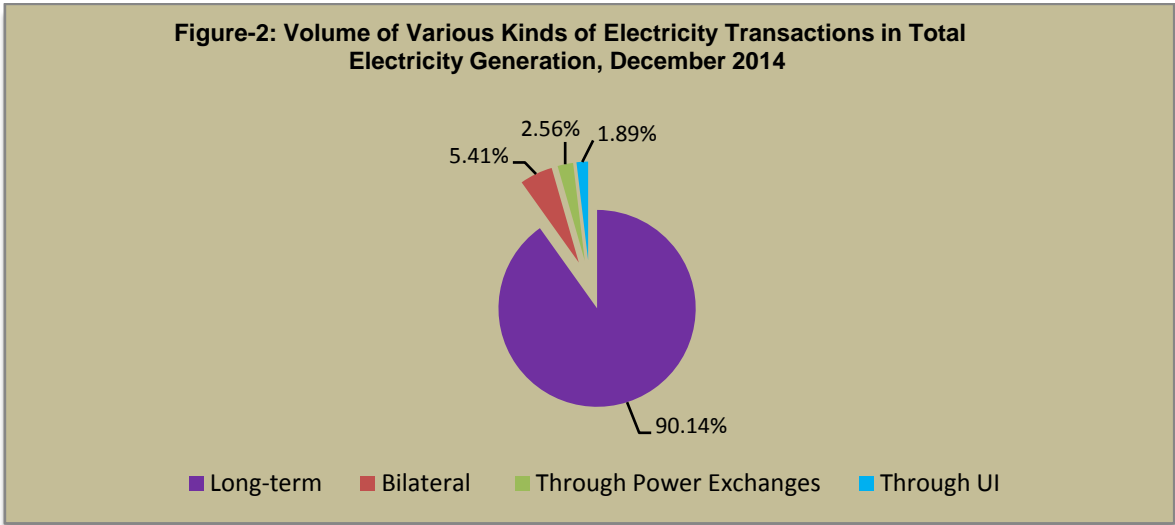

**Figure-3: Volume of Short-term Transactions of Electricity, December 2014 (Day-wise)**

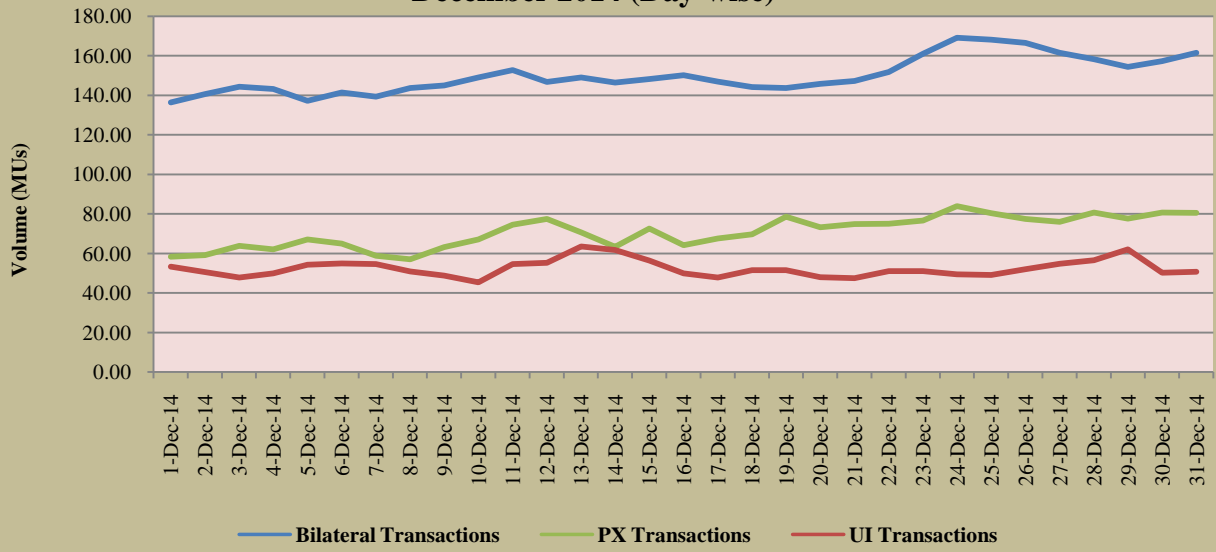

| <b>Table-2: PERCENTAGE SHARE OF ELECTRICITY TRANSACTED BY TRADING LICENSEES, DECEMBER 2014</b>                                                                                                    |                                             |                                                                |                                   |
|---------------------------------------------------------------------------------------------------------------------------------------------------------------------------------------------------|---------------------------------------------|----------------------------------------------------------------|-----------------------------------|
| <b>Sr.No</b>                                                                                                                                                                                      | <b>Name of the Trading Licensee</b>         | <b>% Share in total Volume transacted by Trading Licensees</b> | <b>Herfindahl-Hirschman Index</b> |
| 1                                                                                                                                                                                                 | PTC India Ltd.                              | 28.28%                                                         | 0.0800                            |
| 2                                                                                                                                                                                                 | GMR Energy Trading Ltd.                     | 11.68%                                                         | 0.0136                            |
| 3                                                                                                                                                                                                 | Mittal Processors (P) Ltd.                  | 10.81%                                                         | 0.0117                            |
| 4                                                                                                                                                                                                 | Tata Power Trading Company (P) Ltd.         | 7.92%                                                          | 0.0063                            |
| 5                                                                                                                                                                                                 | JSW Power Trading Company Ltd               | 6.66%                                                          | 0.0044                            |
| 6                                                                                                                                                                                                 | NTPC Vidyut Vyapar Nigam Ltd.               | 6.38%                                                          | 0.0041                            |
| 7                                                                                                                                                                                                 | Shree Cement Ltd.                           | 5.57%                                                          | 0.0031                            |
| 8                                                                                                                                                                                                 | Adani Enterprises Ltd.                      | 5.08%                                                          | 0.0026                            |
| 9                                                                                                                                                                                                 | Knowledge Infrastructure Systems (P) Ltd    | 4.77%                                                          | 0.0023                            |
| 10                                                                                                                                                                                                | Manikaran Power Ltd.                        | 3.58%                                                          | 0.0013                            |
| 11                                                                                                                                                                                                | Jaiprakash Associates Ltd.                  | 3.43%                                                          | 0.0012                            |
| 12                                                                                                                                                                                                | RPG Power Trading Company Ltd.              | 1.29%                                                          | 0.0002                            |
| 13                                                                                                                                                                                                | Instinct Infra & Power Ltd.                 | 0.96%                                                          | 0.0001                            |
| 14                                                                                                                                                                                                | Reliance Energy Trading (P) Ltd             | 0.93%                                                          | 0.0001                            |
| 15                                                                                                                                                                                                | National Energy Trading & Services Ltd.     | 0.61%                                                          | 0.0000                            |
| 16                                                                                                                                                                                                | Arunachal Pradesh Power Corporation (P) ltd | 0.59%                                                          | 0.0000                            |
| 17                                                                                                                                                                                                | My Home Power Private Ltd.                  | 0.44%                                                          | 0.0000                            |
| 18                                                                                                                                                                                                | Essar Electric Power Development Corp. Ltd. | 0.44%                                                          | 0.0000                            |
| 19                                                                                                                                                                                                | SN Power Markets Pvt. Ltd.                  | 0.32%                                                          | 0.0000                            |
| 20                                                                                                                                                                                                | Customized Energy Solutions India (P) Ltd.  | 0.12%                                                          | 0.0000                            |
| 21                                                                                                                                                                                                | Ambitious Power Trading Company Ltd.        | 0.06%                                                          | 0.0000                            |
| 22                                                                                                                                                                                                | Pune Power Development (P) Ltd.             | 0.05%                                                          | 0.0000                            |
| 23                                                                                                                                                                                                | Vandana Vidyut Limited                      | 0.03%                                                          | 0.0000                            |
| <b>TOTAL</b>                                                                                                                                                                                      |                                             | <b>100.00%</b>                                                 | <b>0.1310</b>                     |
| <b>Top 5 trading licensees</b>                                                                                                                                                                    |                                             | <b>65.35%</b>                                                  |                                   |
| <i>Note 1: Volume of electricity transacted by the trading licensees includes bilateral transactions (inter-state &amp; intra-state) and the transactions undertaken through power exchanges.</i> |                                             |                                                                |                                   |
| <i>Note 2: Volume of electricity transacted by Global Energy Ltd is not included.</i>                                                                                                             |                                             |                                                                |                                   |
| <i>Source: Information submitted by trading licensees</i>                                                                                                                                         |                                             |                                                                |                                   |

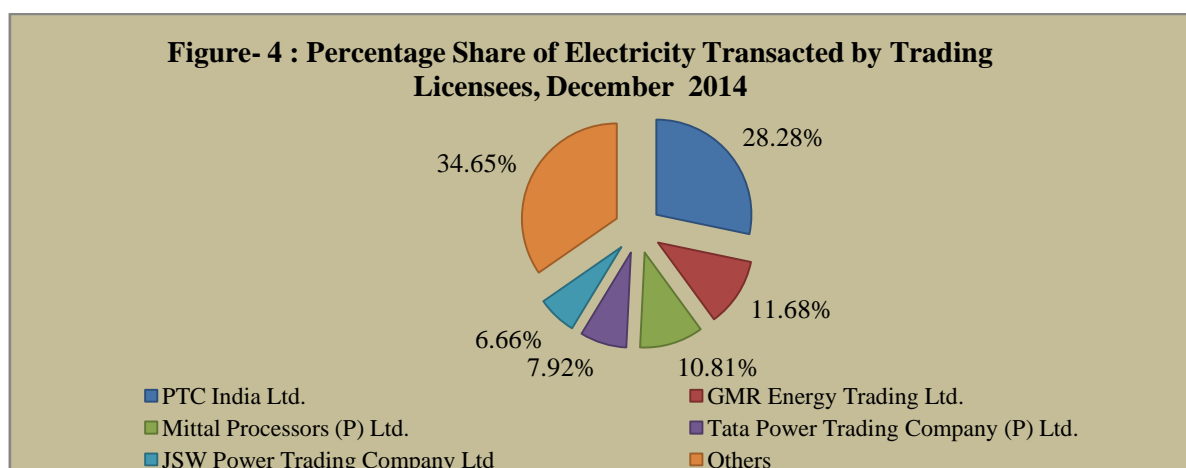



| Table-3: PRICE OF ELECTRICITY TRANSACTED THROUGH TRADERS, DECEMBER 2014 |                  |                               |
|-------------------------------------------------------------------------|------------------|-------------------------------|
| Sr.No                                                                   |                  | Sale Price of Traders (₹/kWh) |
| 1                                                                       | Minimum          | 1.54                          |
| 2                                                                       | Maximum          | 7.99                          |
| 3                                                                       | Weighted Average | 4.33                          |

Source: Information submitted by trading licensees

| Table-4: PRICE OF ELECTRICITY TRANSACTED THROUGH TRADERS (TIME-WISE), DECEMBER 2014 |                 |                               |
|-------------------------------------------------------------------------------------|-----------------|-------------------------------|
| Sr.No                                                                               | Period of Trade | Sale Price of Traders (₹/kWh) |
| 1                                                                                   | RTC             | 4.37                          |
| 2                                                                                   | PEAK            | 4.32                          |
| 3                                                                                   | OFF PEAK        | 3.45                          |

Source: Information submitted by trading licensees

| Table-5: PRICE OF ELECTRICITY TRANSACTED THROUGH POWER EXCHANGES, DECEMBER 2014 |                  |                      |                       |
|---------------------------------------------------------------------------------|------------------|----------------------|-----------------------|
| Sr.No                                                                           | ACP              | Price in IEX (₹/kWh) | Price in PXIL (₹/kWh) |
| 1                                                                               | Minimum          | 1.10                 | 1.33                  |
| 2                                                                               | Maximum          | 20.00                | 4.87                  |
| 3                                                                               | Weighted Average | 3.20                 | 2.85                  |

Source: Information submitted by IEX and PXIL

| Table-6: VOLUME AND PRICE OF ELECTRICITY IN TERM AHEAD MARKET OF IEX, DECEMBER 2014 |                                 |                               |                                |
|-------------------------------------------------------------------------------------|---------------------------------|-------------------------------|--------------------------------|
| Sr.No                                                                               | Term ahead contracts            | Actual Scheduled Volume (MUs) | Weighted Average Price (₹/kWh) |
| 1                                                                                   | Intra-Day Contracts             | 7.60                          | 3.80                           |
| 2                                                                                   | Day Ahead Contingency Contracts | 1.39                          | 3.70                           |
|                                                                                     | <b>Total</b>                    | <b>8.99</b>                   | <b>3.79</b>                    |

Source: IEX

| Table-7: VOLUME AND PRICE OF ELECTRICITY IN TERM AHEAD MARKET OF PXIL, DECEMBER 2014 |                      |                               |                                |
|--------------------------------------------------------------------------------------|----------------------|-------------------------------|--------------------------------|
| Sr.No                                                                                | Term ahead contracts | Actual Scheduled Volume (MUs) | Weighted Average Price (₹/kWh) |
| 1                                                                                    | Intra-Day Contracts  | 17.34                         | 3.50                           |
| 2                                                                                    | Daily Contracts      | 16.40                         | 3.15                           |
| 3                                                                                    | Weekly Contracts     | 66.55                         | 3.09                           |
|                                                                                      | <b>Total</b>         | <b>100.29</b>                 | <b>3.17</b>                    |

Source: PXIL

| Table-8: PRICE OF ELECTRICITY TRANSACTED THROUGH UI, DECEMBER 2014 |         |                                 |
|--------------------------------------------------------------------|---------|---------------------------------|
| Sr.No                                                              |         | Price in All India Grid (₹/kWh) |
| 1                                                                  | Minimum | 0.00                            |
| 2                                                                  | Maximum | 8.24                            |
| 3                                                                  | Average | 1.84                            |

Source: NLDC

**Figure-5: Price of Short-term Transactions of Electricity, December 2014**

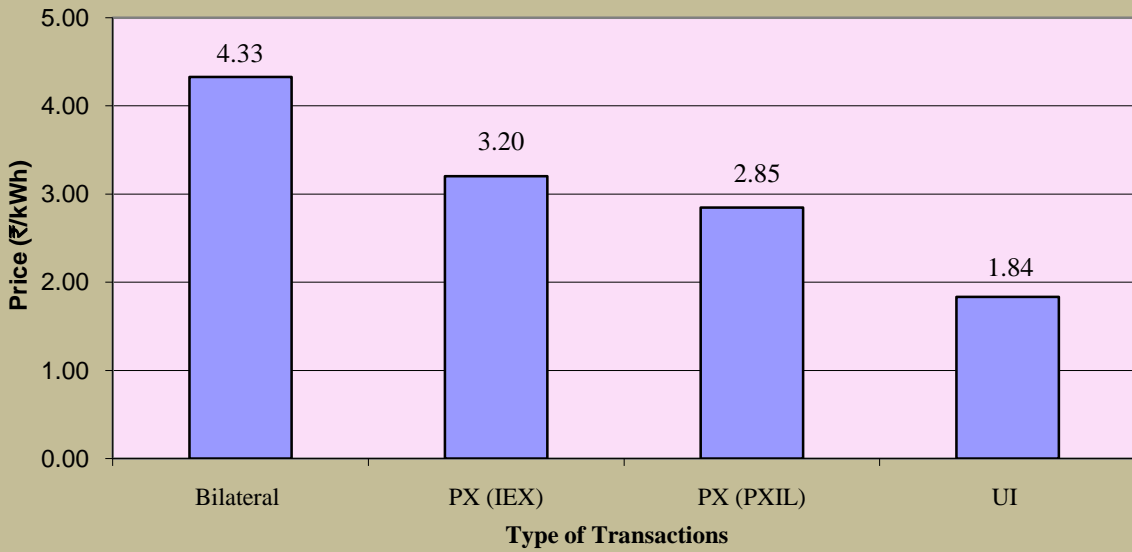

**Figure-6: Price of Short-term Transactions of Electricity, December 2014 (Day-wise)**

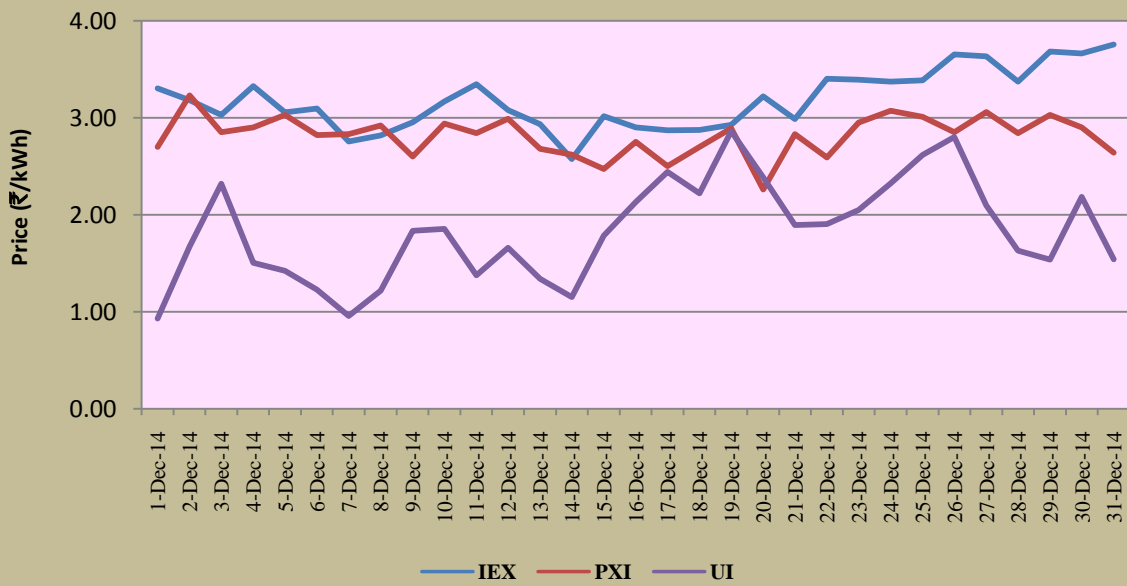

| <b>Table-9: VOLUME OF ELECTRICITY SALE THROUGH BILATERAL,<br/>DECEMBER 2014</b> |                             |                    |
|---------------------------------------------------------------------------------|-----------------------------|--------------------|
| <b>Name of the State/UT/Other Regional Entity</b>                               | <b>Volume of Sale (MUs)</b> | <b>% of Volume</b> |
| Haryana                                                                         | 916.34                      | 22.80%             |
| Delhi                                                                           | 438.87                      | 10.92%             |
| JINDAL POWER                                                                    | 329.00                      | 8.19%              |
| Punjab                                                                          | 321.47                      | 8.00%              |
| Karnataka                                                                       | 314.75                      | 7.83%              |
| Gujarat                                                                         | 286.89                      | 7.14%              |
| West Bengal                                                                     | 277.29                      | 6.90%              |
| SIMHAPURI                                                                       | 262.61                      | 6.53%              |
| STERLITE                                                                        | 208.26                      | 5.18%              |
| Chattisgarh                                                                     | 113.27                      | 2.82%              |
| Rajasthan                                                                       | 112.93                      | 2.81%              |
| SHREE CEMENT                                                                    | 110.53                      | 2.75%              |
| Uttar Pradesh                                                                   | 74.51                       | 1.85%              |
| Orissa                                                                          | 58.41                       | 1.45%              |
| DVC                                                                             | 50.90                       | 1.27%              |
| MP                                                                              | 38.08                       | 0.95%              |
| Himachal Pradesh                                                                | 37.34                       | 0.93%              |
| MAITHON POWER LTD                                                               | 20.26                       | 0.50%              |
| J & K                                                                           | 12.89                       | 0.32%              |
| Telangana                                                                       | 12.82                       | 0.32%              |
| ACBIL                                                                           | 9.80                        | 0.24%              |
| UT Chandigarh                                                                   | 7.44                        | 0.19%              |
| Tripura                                                                         | 2.62                        | 0.07%              |
| Manipur                                                                         | 1.12                        | 0.03%              |
| Goa                                                                             | 0.30                        | 0.01%              |
| KARCHAM WANGTOO                                                                 | 0.27                        | 0.01%              |
| AD HYDRO                                                                        | 0.22                        | 0.01%              |
| DCPP                                                                            | 0.06                        | 0.00%              |
| <b>Total</b>                                                                    | <b>4019.24</b>              | <b>100.00%</b>     |
| <b>Volume of sale by top 5 States</b>                                           | <b>2320.43</b>              | <b>57.73%</b>      |

| <b>Table-10: VOLUME OF ELECTRICITY PURCHASE THROUGH BILATERAL, DECEMBER 2014</b> |                                 |                    |
|----------------------------------------------------------------------------------|---------------------------------|--------------------|
| <b>Name of the State/UT/Other Regional Entity</b>                                | <b>Volume of Purchase (MUs)</b> | <b>% of Volume</b> |
| Rajasthan                                                                        | 603.39                          | 13.94%             |
| MP                                                                               | 548.93                          | 12.68%             |
| Andhra Pradesh                                                                   | 476.98                          | 11.02%             |
| Himachal Pradesh                                                                 | 414.11                          | 9.57%              |
| J & K                                                                            | 379.30                          | 8.76%              |
| Maharashtra                                                                      | 355.03                          | 8.20%              |
| Telangana                                                                        | 329.38                          | 7.61%              |
| Bihar                                                                            | 216.66                          | 5.01%              |
| Haryana                                                                          | 207.99                          | 4.81%              |
| Uttarakhand                                                                      | 162.02                          | 3.74%              |
| Jharkhand                                                                        | 113.11                          | 2.61%              |
| Uttar Pradesh                                                                    | 111.75                          | 2.58%              |
| Orissa                                                                           | 97.96                           | 2.26%              |
| Kerala                                                                           | 94.62                           | 2.19%              |
| Meghalaya                                                                        | 40.84                           | 0.94%              |
| Tamilnadu                                                                        | 32.96                           | 0.76%              |
| West Bengal                                                                      | 30.47                           | 0.70%              |
| Goa                                                                              | 29.14                           | 0.67%              |
| Gujarat                                                                          | 20.10                           | 0.46%              |
| Delhi                                                                            | 19.78                           | 0.46%              |
| Manipur                                                                          | 17.31                           | 0.40%              |
| Nagaland                                                                         | 10.89                           | 0.25%              |
| Assam                                                                            | 5.86                            | 0.14%              |
| Chattisgarh                                                                      | 3.72                            | 0.09%              |
| Sikkim                                                                           | 2.88                            | 0.07%              |
| Mizoram                                                                          | 1.30                            | 0.03%              |
| AD HYDRO                                                                         | 1.00                            | 0.02%              |
| Meenakshi                                                                        | 0.99                            | 0.02%              |
| <b>Total</b>                                                                     | <b>4328.48</b>                  | <b>100.00%</b>     |
| <b>Volume of Purchase by top 5 States</b>                                        | <b>2422.71</b>                  | <b>55.97%</b>      |

| <b>Table-11: VOLUME OF ELECTRICITY SALE THROUGH POWER EXCHANGES, DECEMBER 2014</b> |                             |                    |
|------------------------------------------------------------------------------------|-----------------------------|--------------------|
| <b>Name of the State/UT/Other Regional Entity</b>                                  | <b>Volume of Sale (MUs)</b> | <b>% of Volume</b> |
| DCPP                                                                               | 165.83                      | 7.54%              |
| Karnataka                                                                          | 159.34                      | 7.24%              |
| Chattisgarh                                                                        | 156.49                      | 7.11%              |
| STERLITE                                                                           | 151.46                      | 6.88%              |
| Maharashtra                                                                        | 144.43                      | 6.56%              |
| Gujarat                                                                            | 135.93                      | 6.18%              |
| JAYPEE NIGRIE                                                                      | 129.72                      | 5.90%              |
| MP                                                                                 | 113.18                      | 5.14%              |
| Himachal Pradesh                                                                   | 102.89                      | 4.68%              |
| JINDAL POWER                                                                       | 91.46                       | 4.16%              |
| Rajasthan                                                                          | 66.50                       | 3.02%              |
| KARCHAM WANGTOO                                                                    | 62.18                       | 2.83%              |
| GMR KAMALANGA                                                                      | 61.67                       | 2.80%              |
| DVC                                                                                | 58.99                       | 2.68%              |
| MAITHON POWER LTD                                                                  | 53.64                       | 2.44%              |
| West Bengal                                                                        | 51.05                       | 2.32%              |
| Tripura                                                                            | 50.31                       | 2.29%              |
| Andhra Pradesh                                                                     | 40.63                       | 1.85%              |
| ACBIL                                                                              | 37.65                       | 1.71%              |
| Telangana                                                                          | 30.72                       | 1.40%              |
| Meenakshi                                                                          | 29.81                       | 1.36%              |
| ONGC PALATANA                                                                      | 27.81                       | 1.26%              |
| EMCO                                                                               | 27.24                       | 1.24%              |
| Orissa                                                                             | 26.10                       | 1.19%              |
| DHARIWAL POWER                                                                     | 26.06                       | 1.18%              |
| SHREE CEMENT                                                                       | 25.74                       | 1.17%              |
| Goa                                                                                | 20.03                       | 0.91%              |
| Delhi                                                                              | 20.03                       | 0.91%              |
| SIMHAPURI                                                                          | 19.85                       | 0.90%              |
| Sikkim                                                                             | 16.82                       | 0.76%              |
| AD HYDRO                                                                           | 14.27                       | 0.65%              |
| VANDANA VIDYUT                                                                     | 13.07                       | 0.59%              |
| CHUZACHEN HEP                                                                      | 12.66                       | 0.58%              |
| J & K                                                                              | 11.53                       | 0.52%              |
| TEESTA HEP                                                                         | 7.97                        | 0.36%              |
| Manipur                                                                            | 5.97                        | 0.27%              |
| Uttarakhand                                                                        | 5.30                        | 0.24%              |
| NJPC                                                                               | 4.95                        | 0.22%              |
| Haryana                                                                            | 4.83                        | 0.22%              |
| RANGIT HEP                                                                         | 3.65                        | 0.17%              |
| Kerala                                                                             | 2.75                        | 0.13%              |
| Assam                                                                              | 2.61                        | 0.12%              |
| LANCO BUDHIL                                                                       | 2.55                        | 0.12%              |
| NEEPCO Stations                                                                    | 1.30                        | 0.06%              |
| Mizoram                                                                            | 1.20                        | 0.05%              |
| Bihar                                                                              | 1.06                        | 0.05%              |
| ADHUNIK POWER LTD                                                                  | 0.41                        | 0.02%              |
| MALANA                                                                             | 0.39                        | 0.02%              |
| UT Chandigarh                                                                      | 0.01                        | 0.00%              |
| <b>Total</b>                                                                       | <b>2200.06</b>              | <b>100.00%</b>     |
| <b>Volume of sale by top 5 States</b>                                              | <b>777.56</b>               | <b>35.34%</b>      |

| <b>Table-12: VOLUME OF ELECTRICITY PURCHASE THROUGH POWER EXCHANGES, DECEMBER 2014</b> |                                 |                    |
|----------------------------------------------------------------------------------------|---------------------------------|--------------------|
| <b>Name of the State/UT/Other Regional Entity</b>                                      | <b>Volume of Purchase (MUs)</b> | <b>% of Volume</b> |
| Rajasthan                                                                              | 388.59                          | 17.66%             |
| Uttarakhand                                                                            | 291.68                          | 13.26%             |
| Gujarat                                                                                | 245.79                          | 11.17%             |
| Delhi                                                                                  | 167.49                          | 7.61%              |
| Kerala                                                                                 | 162.27                          | 7.38%              |
| Maharashtra                                                                            | 119.25                          | 5.42%              |
| ESSAR STEEL                                                                            | 100.48                          | 4.57%              |
| Haryana                                                                                | 80.01                           | 3.64%              |
| Telangana                                                                              | 76.60                           | 3.48%              |
| Andhra Pradesh                                                                         | 74.77                           | 3.40%              |
| MP                                                                                     | 64.40                           | 2.93%              |
| J & K                                                                                  | 63.05                           | 2.87%              |
| West Bengal                                                                            | 59.03                           | 2.68%              |
| Karnataka                                                                              | 49.74                           | 2.26%              |
| Punjab                                                                                 | 38.57                           | 1.75%              |
| Tamilnadu                                                                              | 37.66                           | 1.71%              |
| Meghalaya                                                                              | 34.13                           | 1.55%              |
| Daman and Diu                                                                          | 31.26                           | 1.42%              |
| BALCO                                                                                  | 30.28                           | 1.38%              |
| Assam                                                                                  | 24.37                           | 1.11%              |
| Manipur                                                                                | 10.04                           | 0.46%              |
| Arunachal Pradesh                                                                      | 10.01                           | 0.46%              |
| Chattisgarh                                                                            | 9.36                            | 0.43%              |
| UT Chandigarh                                                                          | 7.02                            | 0.32%              |
| Himachal Pradesh                                                                       | 6.73                            | 0.31%              |
| Uttar Pradesh                                                                          | 6.43                            | 0.29%              |
| Bihar                                                                                  | 5.55                            | 0.25%              |
| Goa                                                                                    | 3.10                            | 0.14%              |
| Nagaland                                                                               | 1.47                            | 0.07%              |
| Orissa                                                                                 | 0.91                            | 0.04%              |
| <b>Total</b>                                                                           | <b>2200.06</b>                  | <b>100.00%</b>     |
| <b>Volume of purchase by top 5 States</b>                                              | <b>1255.81</b>                  | <b>57.08%</b>      |

| Table-13: VOLUME OF ELECTRICITY EXPORT THROUGH UI, DECEMBER 2014 |                        |                |
|------------------------------------------------------------------|------------------------|----------------|
| Name of the State/UT/Other Regional Entity                       | Volume of Export (MUs) | % of Volume    |
| Maharashtra                                                      | 193.98                 | 15.77%         |
| Uttar Pradesh                                                    | 133.80                 | 10.88%         |
| Haryana                                                          | 101.62                 | 8.26%          |
| Bihar                                                            | 89.97                  | 7.31%          |
| Tamilnadu                                                        | 76.03                  | 6.18%          |
| Gujarat                                                          | 68.85                  | 5.60%          |
| Delhi                                                            | 67.49                  | 5.49%          |
| MP                                                               | 65.97                  | 5.36%          |
| Rajasthan                                                        | 54.94                  | 4.47%          |
| Punjab                                                           | 44.89                  | 3.65%          |
| Chattisgarh                                                      | 30.37                  | 2.47%          |
| NHPC Stations                                                    | 26.36                  | 2.14%          |
| DVC                                                              | 24.90                  | 2.02%          |
| Uttarakhand                                                      | 19.45                  | 1.58%          |
| Andhra Pradesh                                                   | 17.10                  | 1.39%          |
| Himachal Pradesh                                                 | 17.00                  | 1.38%          |
| Jharkhand                                                        | 15.09                  | 1.23%          |
| JINDAL POWER                                                     | 14.58                  | 1.19%          |
| Goa                                                              | 14.57                  | 1.18%          |
| West Bengal                                                      | 13.79                  | 1.12%          |
| Orissa                                                           | 12.65                  | 1.03%          |
| CGPL                                                             | 10.90                  | 0.89%          |
| Sikkim                                                           | 10.82                  | 0.88%          |
| Karnataka                                                        | 10.66                  | 0.87%          |
| Telangana                                                        | 9.94                   | 0.81%          |
| MAITHON POWER LTD                                                | 8.32                   | 0.68%          |
| STERLITE                                                         | 7.76                   | 0.63%          |
| NEEPCO Stations                                                  | 5.54                   | 0.45%          |
| NJPC                                                             | 5.49                   | 0.45%          |
| J & K                                                            | 5.44                   | 0.44%          |
| Pondicherry                                                      | 5.30                   | 0.43%          |
| KARCHAM WANGTOO                                                  | 5.02                   | 0.41%          |
| Daman and Diu                                                    | 4.97                   | 0.40%          |
| Dadra & Nagar Haveli                                             | 4.31                   | 0.35%          |
| DCPP                                                             | 4.30                   | 0.35%          |
| Meghalaya                                                        | 3.92                   | 0.32%          |
| Assam                                                            | 3.90                   | 0.32%          |
| ACBIL                                                            | 3.36                   | 0.27%          |
| LANKO_AMK                                                        | 2.99                   | 0.24%          |
| Manipur                                                          | 2.52                   | 0.21%          |
| UT Chandigarh                                                    | 1.82                   | 0.15%          |
| SHREE CEMENT                                                     | 1.66                   | 0.14%          |
| NSPCL                                                            | 1.52                   | 0.12%          |
| Kerala                                                           | 1.44                   | 0.12%          |
| SIMHAPURI                                                        | 1.40                   | 0.11%          |
| BALCO                                                            | 1.31                   | 0.11%          |
| Tripura                                                          | 1.13                   | 0.09%          |
| AD HYDRO                                                         | 0.57                   | 0.05%          |
| Arunachal Pradesh                                                | 0.12                   | 0.01%          |
| Mizoram                                                          | 0.10                   | 0.01%          |
| Nagaland                                                         | 0.07                   | 0.01%          |
| RGPPL(Dabhol)                                                    | 0.04                   | 0.00%          |
| <b>Total</b>                                                     | <b>1230.06</b>         | <b>100.00%</b> |
| <b>Volume of Export by top 5 States</b>                          | <b>595.39</b>          | <b>48.40%</b>  |

| Table-14: VOLUME OF ELECTRICITY IMPORT THROUGH UI, DECEMBER 2014 |                        |                |
|------------------------------------------------------------------|------------------------|----------------|
| Name of the State/UT/Other Regional Entity                       | Volume of Import (MUs) | % of Volume    |
| Punjab                                                           | 93.59                  | 7.19%          |
| Kerala                                                           | 80.79                  | 6.20%          |
| J & K                                                            | 79.63                  | 6.11%          |
| Rajasthan                                                        | 79.03                  | 6.07%          |
| Orissa                                                           | 75.28                  | 5.78%          |
| Telangana                                                        | 73.70                  | 5.66%          |
| Karnataka                                                        | 70.58                  | 5.42%          |
| Gujarat                                                          | 66.34                  | 5.09%          |
| West Bengal                                                      | 62.34                  | 4.79%          |
| Uttar Pradesh                                                    | 48.20                  | 3.70%          |
| Andhra Pradesh                                                   | 43.38                  | 3.33%          |
| MP                                                               | 39.05                  | 3.00%          |
| Haryana                                                          | 38.06                  | 2.92%          |
| Uttarakhand                                                      | 35.26                  | 2.71%          |
| Chattisgarh                                                      | 33.93                  | 2.61%          |
| DVC                                                              | 30.43                  | 2.34%          |
| Assam                                                            | 25.73                  | 1.98%          |
| Himachal Pradesh                                                 | 24.99                  | 1.92%          |
| Bihar                                                            | 21.96                  | 1.69%          |
| Delhi                                                            | 21.57                  | 1.66%          |
| Maharashtra                                                      | 21.02                  | 1.61%          |
| Arunachal Pradesh                                                | 20.59                  | 1.58%          |
| Jharkhand                                                        | 20.30                  | 1.56%          |
| STERLITE                                                         | 18.97                  | 1.46%          |
| CGPL                                                             | 17.00                  | 1.31%          |
| UT Chandigarh                                                    | 16.86                  | 1.29%          |
| Tamilnadu                                                        | 16.79                  | 1.29%          |
| Tripura                                                          | 16.02                  | 1.23%          |
| Goa                                                              | 12.22                  | 0.94%          |
| Nagaland                                                         | 11.29                  | 0.87%          |
| Mizoram                                                          | 10.04                  | 0.77%          |
| JINDAL POWER                                                     | 6.90                   | 0.53%          |
| ACBIL                                                            | 6.58                   | 0.51%          |
| RGPPL(Dabhol)                                                    | 6.41                   | 0.49%          |
| BALCO                                                            | 5.72                   | 0.44%          |
| Manipur                                                          | 5.67                   | 0.44%          |
| SHREE CEMENT                                                     | 5.05                   | 0.39%          |
| Meghalaya                                                        | 4.90                   | 0.38%          |
| NHPC Stations                                                    | 4.75                   | 0.36%          |
| MAITHON POWER LTD                                                | 4.33                   | 0.33%          |
| DCPP                                                             | 4.30                   | 0.33%          |
| SIMHAPURI                                                        | 4.30                   | 0.33%          |
| Dadra & Nagar Haveli                                             | 3.37                   | 0.26%          |
| Pondicherry                                                      | 2.92                   | 0.22%          |
| KARCHAM WANGTOO                                                  | 2.79                   | 0.21%          |
| NSPCL                                                            | 2.14                   | 0.16%          |
| NJPC                                                             | 1.53                   | 0.12%          |
| NEEPCO Stations                                                  | 1.46                   | 0.11%          |
| Daman and Diu                                                    | 1.37                   | 0.10%          |
| LANKO_AMK                                                        | 1.12                   | 0.09%          |
| AD HYDRO                                                         | 0.91                   | 0.07%          |
| Sikkim                                                           | 0.87                   | 0.07%          |
| <b>Total</b>                                                     | <b>1302.32</b>         | <b>100.00%</b> |
| <b>Volume of Import by top 5 States</b>                          | <b>408.32</b>          | <b>31.35%</b>  |



| Table-15: TOTAL VOLUME OF NET SHORT-TERM TRANSACTIONS OF ELECTRICITY (REGIONAL ENTITY-WISE), DECEMBER 2014 |                                            |                                                             |
|------------------------------------------------------------------------------------------------------------|--------------------------------------------|-------------------------------------------------------------|
| Sr.No.                                                                                                     | Name of the State/UT/Other Regional Entity | Total volume of net short-term transactions of electricity* |
| 1                                                                                                          | Rajasthan                                  | 836.65                                                      |
| 2                                                                                                          | Andhra Pradesh                             | 537.40                                                      |
| 3                                                                                                          | J & K                                      | 492.13                                                      |
| 4                                                                                                          | Uttarakhand                                | 464.21                                                      |
| 5                                                                                                          | MP                                         | 435.15                                                      |
| 6                                                                                                          | Telangana                                  | 426.20                                                      |
| 7                                                                                                          | Kerala                                     | 333.48                                                      |
| 8                                                                                                          | Himachal Pradesh                           | 288.59                                                      |
| 9                                                                                                          | Maharashtra                                | 156.90                                                      |
| 10                                                                                                         | Bihar                                      | 153.15                                                      |
| 11                                                                                                         | Jharkhand                                  | 118.32                                                      |
| 12                                                                                                         | ESSAR STEEL                                | 100.48                                                      |
| 13                                                                                                         | Orissa                                     | 76.99                                                       |
| 14                                                                                                         | Meghalaya                                  | 75.96                                                       |
| 15                                                                                                         | Assam                                      | 49.45                                                       |
| 16                                                                                                         | BALCO                                      | 34.69                                                       |
| 17                                                                                                         | Arunachal Pradesh                          | 30.49                                                       |
| 18                                                                                                         | Daman and Diu                              | 27.66                                                       |
| 19                                                                                                         | Nagaland                                   | 23.58                                                       |
| 20                                                                                                         | Manipur                                    | 23.41                                                       |
| 21                                                                                                         | UT Chandigarh                              | 14.61                                                       |
| 22                                                                                                         | Tamilnadu                                  | 11.39                                                       |
| 23                                                                                                         | Mizoram                                    | 10.04                                                       |
| 24                                                                                                         | Goa                                        | 9.55                                                        |
| 25                                                                                                         | RGPPL(Dabhol)                              | 6.37                                                        |
| 26                                                                                                         | CGPL                                       | 6.10                                                        |
| 27                                                                                                         | NSPCL                                      | 0.62                                                        |
| 28                                                                                                         | MALANA                                     | -0.39                                                       |
| 29                                                                                                         | ADHUNIK POWER LTD                          | -0.41                                                       |
| 30                                                                                                         | Dadra & Nagar Haveli                       | -0.94                                                       |
| 31                                                                                                         | LANKO_AMK                                  | -1.87                                                       |
| 32                                                                                                         | Pondicherry                                | -2.38                                                       |
| 33                                                                                                         | LANCO BUDHIL                               | -2.55                                                       |
| 34                                                                                                         | RANGIT HEP                                 | -3.65                                                       |
| 35                                                                                                         | NEEPCO Stations                            | -5.39                                                       |
| 36                                                                                                         | TEESTA HEP                                 | -7.97                                                       |
| 37                                                                                                         | NJPC                                       | -8.91                                                       |
| 38                                                                                                         | CHUZACHEN HEP                              | -12.66                                                      |
| 39                                                                                                         | VANDANA VIDYUT                             | -13.07                                                      |
| 40                                                                                                         | AD HYDRO                                   | -13.15                                                      |
| 41                                                                                                         | NHPC Stations                              | -21.61                                                      |
| 42                                                                                                         | Sikkim                                     | -23.90                                                      |
| 43                                                                                                         | DHARIWAL POWER                             | -26.06                                                      |
| 44                                                                                                         | EMCO                                       | -27.24                                                      |
| 45                                                                                                         | ONGC PALATANA                              | -27.81                                                      |
| 46                                                                                                         | Meenakshi                                  | -28.82                                                      |
| 47                                                                                                         | Tripura                                    | -38.03                                                      |
| 48                                                                                                         | Uttar Pradesh                              | -41.92                                                      |
| 49                                                                                                         | ACBIL                                      | -44.23                                                      |
| 50                                                                                                         | GMR KAMALANGA                              | -61.67                                                      |
| 51                                                                                                         | KARCHAM WANGTOO                            | -64.68                                                      |
| 52                                                                                                         | MAITHON POWER LTD                          | -77.89                                                      |
| 53                                                                                                         | DVC                                        | -104.35                                                     |
| 54                                                                                                         | JAYPEE NIGRIE                              | -129.72                                                     |

|                                                                                                                                                   |              |         |
|---------------------------------------------------------------------------------------------------------------------------------------------------|--------------|---------|
| 55                                                                                                                                                | SHREE CEMENT | -132.89 |
| 56                                                                                                                                                | Gujarat      | -159.45 |
| 57                                                                                                                                                | D CPP        | -165.88 |
| 58                                                                                                                                                | West Bengal  | -190.29 |
| 59                                                                                                                                                | Punjab       | -234.19 |
| 60                                                                                                                                                | Chattisgarh  | -253.13 |
| 61                                                                                                                                                | SIMHAPURI    | -279.56 |
| 62                                                                                                                                                | Delhi        | -317.57 |
| 63                                                                                                                                                | STERLITE     | -348.51 |
| 64                                                                                                                                                | Karnataka    | -364.43 |
| 65                                                                                                                                                | JINDAL POWER | -428.13 |
| 66                                                                                                                                                | Haryana      | -696.73 |
| * Total volume of net short-term transactions of electricity includes net of transactions of electricity through bilateral, power exchange and UI |              |         |
| (-) indicates sale and (+) indicates purchase                                                                                                     |              |         |

| <b>Table-16: DETAILS OF CONGESTION IN POWER EXCHANGES, DECEMBER 2014</b>    |                                                                                                                                      |            |             |
|-----------------------------------------------------------------------------|--------------------------------------------------------------------------------------------------------------------------------------|------------|-------------|
|                                                                             | <b>Details of Congestion</b>                                                                                                         | <b>IEX</b> | <b>PXIL</b> |
| A                                                                           | Unconstrained Cleared Volume* (MUs)                                                                                                  | 2318.55    | 33.11       |
| B                                                                           | Actual Cleared Volume and hence scheduled (MUs)                                                                                      | 2168.82    | 31.24       |
| C                                                                           | Volume of electricity that could not be cleared and hence not scheduled because of congestion (MUs) (A-B)                            | 149.73     | 1.87        |
| D                                                                           | Volume of electricity that could not be cleared as % to Unconstrained Cleared Volume                                                 | 6.46%      | 5.65%       |
| E                                                                           | Percentage of the time congestion occurred during the month (Number of hours congestion occurred/Total number of hours in the month) | 96.61%     | 19.93%      |
| F                                                                           | Congestion occurrence (%) time block wise                                                                                            |            |             |
|                                                                             | 0.00 - 6.00 hours                                                                                                                    | 23.58%     | 29.68%      |
|                                                                             | 6.00 - 12.00 hours                                                                                                                   | 25.84%     | 12.14%      |
|                                                                             | 12.00 - 18.00 hours                                                                                                                  | 25.39%     | 14.84%      |
|                                                                             | 18.00 - 24.00 hours                                                                                                                  | 25.18%     | 43.34%      |
| <i>* This power would have been scheduled had there been no congestion.</i> |                                                                                                                                      |            |             |
| <i>Source: IEX &amp; PXIL &amp; NLDC</i>                                    |                                                                                                                                      |            |             |

| <b>Table-17: VOLUME OF SHORT-TERM TRANSACTIONS OF ELECTRICITY IN INDIA (MUs), DECEMBER 2014 (DAY-WISE)</b> |                                  |                |                                                                   |              |                                                               | <b>Total Electricity Generation (MU) as given at CEA Website</b> |
|------------------------------------------------------------------------------------------------------------|----------------------------------|----------------|-------------------------------------------------------------------|--------------|---------------------------------------------------------------|------------------------------------------------------------------|
| <b>Date</b>                                                                                                | <b>Bilateral</b>                 |                | <b>Power Exchange (Area Clearing Volume# of Day Ahead Market)</b> |              | <b>Unscheduled Interchange (Over Drawl+ Under Generation)</b> |                                                                  |
|                                                                                                            | <b>Through Traders and PXs**</b> | <b>Direct</b>  | <b>IEX</b>                                                        | <b>PXI</b>   |                                                               |                                                                  |
| 1-Dec-14                                                                                                   | 95.91                            | 40.54          | 58.05                                                             | 0.38         | 53.32                                                         | 2781.74                                                          |
| 2-Dec-14                                                                                                   | 99.78                            | 40.91          | 58.96                                                             | 0.29         | 50.55                                                         | 2817.57                                                          |
| 3-Dec-14                                                                                                   | 103.71                           | 40.59          | 63.35                                                             | 0.60         | 47.91                                                         | 2859.08                                                          |
| 4-Dec-14                                                                                                   | 102.19                           | 41.04          | 61.78                                                             | 0.42         | 49.94                                                         | 2860.47                                                          |
| 5-Dec-14                                                                                                   | 96.52                            | 40.82          | 64.93                                                             | 2.29         | 54.43                                                         | 2854.94                                                          |
| 6-Dec-14                                                                                                   | 97.53                            | 44.01          | 63.09                                                             | 1.90         | 55.02                                                         | 2834.81                                                          |
| 7-Dec-14                                                                                                   | 96.18                            | 43.13          | 57.57                                                             | 1.35         | 54.65                                                         | 2773.26                                                          |
| 8-Dec-14                                                                                                   | 104.45                           | 39.34          | 56.37                                                             | 0.75         | 50.87                                                         | 2858.50                                                          |
| 9-Dec-14                                                                                                   | 104.19                           | 40.76          | 62.41                                                             | 0.91         | 48.82                                                         | 2888.86                                                          |
| 10-Dec-14                                                                                                  | 104.13                           | 44.89          | 66.32                                                             | 0.90         | 45.45                                                         | 2873.76                                                          |
| 11-Dec-14                                                                                                  | 105.53                           | 47.30          | 73.85                                                             | 0.83         | 54.64                                                         | 2850.54                                                          |
| 12-Dec-14                                                                                                  | 104.33                           | 42.51          | 76.70                                                             | 0.84         | 55.30                                                         | 2788.13                                                          |
| 13-Dec-14                                                                                                  | 110.04                           | 39.02          | 69.77                                                             | 0.90         | 63.57                                                         | 2734.53                                                          |
| 14-Dec-14                                                                                                  | 102.86                           | 43.67          | 62.49                                                             | 0.91         | 61.86                                                         | 2574.90                                                          |
| 15-Dec-14                                                                                                  | 104.23                           | 44.12          | 72.12                                                             | 0.55         | 56.44                                                         | 2613.39                                                          |
| 16-Dec-14                                                                                                  | 107.37                           | 42.88          | 63.73                                                             | 0.51         | 50.05                                                         | 2657.84                                                          |
| 17-Dec-14                                                                                                  | 106.15                           | 40.83          | 67.10                                                             | 0.51         | 47.80                                                         | 2654.26                                                          |
| 18-Dec-14                                                                                                  | 107.53                           | 36.67          | 68.74                                                             | 1.04         | 51.55                                                         | 2660.53                                                          |
| 19-Dec-14                                                                                                  | 107.47                           | 36.30          | 77.13                                                             | 1.56         | 51.55                                                         | 2696.34                                                          |
| 20-Dec-14                                                                                                  | 108.81                           | 37.06          | 72.71                                                             | 0.69         | 48.08                                                         | 2708.77                                                          |
| 21-Dec-14                                                                                                  | 110.83                           | 36.46          | 73.79                                                             | 1.18         | 47.59                                                         | 2684.71                                                          |
| 22-Dec-14                                                                                                  | 113.31                           | 38.51          | 74.23                                                             | 0.85         | 51.19                                                         | 2759.74                                                          |
| 23-Dec-14                                                                                                  | 116.55                           | 44.57          | 75.38                                                             | 1.28         | 51.05                                                         | 2804.47                                                          |
| 24-Dec-14                                                                                                  | 117.74                           | 51.39          | 82.53                                                             | 1.50         | 49.46                                                         | 2792.97                                                          |
| 25-Dec-14                                                                                                  | 119.70                           | 48.50          | 78.94                                                             | 1.47         | 49.13                                                         | 2794.01                                                          |
| 26-Dec-14                                                                                                  | 120.82                           | 45.75          | 76.00                                                             | 1.58         | 52.07                                                         | 2814.44                                                          |
| 27-Dec-14                                                                                                  | 114.69                           | 46.92          | 74.88                                                             | 1.20         | 54.83                                                         | 2808.01                                                          |
| 28-Dec-14                                                                                                  | 108.09                           | 50.13          | 79.78                                                             | 1.06         | 56.54                                                         | 2723.00                                                          |
| 29-Dec-14                                                                                                  | 102.31                           | 52.12          | 76.38                                                             | 1.30         | 62.08                                                         | 2821.26                                                          |
| 30-Dec-14                                                                                                  | 103.70                           | 53.65          | 79.82                                                             | 1.02         | 50.38                                                         | 2840.72                                                          |
| 31-Dec-14                                                                                                  | 107.50                           | 54.05          | 79.91                                                             | 0.69         | 50.74                                                         | 2809.19                                                          |
| <b>Total</b>                                                                                               | <b>3304.14</b>                   | <b>1348.43</b> | <b>2168.82</b>                                                    | <b>31.24</b> | <b>1626.84</b>                                                | <b>85994.74</b>                                                  |

Source: NLDC

\* Gross Electricity Generation excluding electricity generation from renewables and captive power plants.

\*\* The volume of bilateral through PXs represents the volume through term-ahead contracts.

# Area Clearing Volume represents the scheduled volume of all the bid areas.

**Table-18: PRICE OF SHORT-TERM TRANSACTIONS OF ELECTRICITY (₹/kWh), DECEMBER 2014 (DAY-WISE)**

| Market Segment | Day ahead market of IEX |               |             | Day ahead market of PXIL |              |             | Under Draw/Over Drawl from the Grid (UI) |                |                 |
|----------------|-------------------------|---------------|-------------|--------------------------|--------------|-------------|------------------------------------------|----------------|-----------------|
|                | Date                    | Minimum ACP   | Maximum ACP | Weighted Average Price*  | Minimum ACP  | Maximum ACP | Weighted Average Price*                  | All India Grid |                 |
|                |                         |               |             |                          |              |             | Mini-mum Price                           | Maxi-mum Price | Average Price** |
| 1-Dec-14       | 1.47                    | 10.02         | 3.30        | 2.70                     | 2.70         | 2.70        | 0.00                                     | 4.91           | 0.93            |
| 2-Dec-14       | 1.44                    | 12.00         | 3.18        | 3.00                     | 3.75         | 3.23        | 0.00                                     | 5.32           | 1.67            |
| 3-Dec-14       | 1.20                    | 17.50         | 3.03        | 2.00                     | 3.50         | 2.85        | 0.00                                     | 8.03           | 2.32            |
| 4-Dec-14       | 1.20                    | 10.02         | 3.33        | 1.95                     | 3.50         | 2.90        | 0.00                                     | 5.32           | 1.51            |
| 5-Dec-14       | 1.20                    | 10.02         | 3.06        | 1.90                     | 4.68         | 3.03        | 0.00                                     | 5.11           | 1.42            |
| 6-Dec-14       | 1.15                    | 10.52         | 3.10        | 2.01                     | 3.75         | 2.82        | 0.00                                     | 5.11           | 1.23            |
| 7-Dec-14       | 1.10                    | 20.00         | 2.76        | 1.33                     | 3.50         | 2.83        | 0.00                                     | 5.32           | 0.96            |
| 8-Dec-14       | 1.18                    | 6.02          | 2.82        | 1.90                     | 3.75         | 2.92        | 0.00                                     | 5.32           | 1.22            |
| 9-Dec-14       | 1.67                    | 20.00         | 2.95        | 1.70                     | 3.29         | 2.60        | 0.00                                     | 8.24           | 1.84            |
| 10-Dec-14      | 2.00                    | 6.02          | 3.17        | 1.90                     | 3.76         | 2.94        | 0.00                                     | 6.36           | 1.85            |
| 11-Dec-14      | 2.00                    | 10.02         | 3.35        | 2.00                     | 4.20         | 2.84        | 0.00                                     | 5.74           | 1.38            |
| 12-Dec-14      | 1.10                    | 6.02          | 3.08        | 2.00                     | 4.44         | 2.99        | 0.00                                     | 7.20           | 1.66            |
| 13-Dec-14      | 1.60                    | 18.50         | 2.93        | 1.62                     | 4.10         | 2.68        | 0.00                                     | 5.74           | 1.34            |
| 14-Dec-14      | 1.75                    | 6.02          | 2.57        | 1.87                     | 4.01         | 2.62        | 0.00                                     | 5.11           | 1.15            |
| 15-Dec-14      | 1.40                    | 6.02          | 3.02        | 1.75                     | 4.01         | 2.47        | 0.00                                     | 7.20           | 1.79            |
| 16-Dec-14      | 1.75                    | 6.02          | 2.90        | 1.69                     | 4.01         | 2.75        | 0.00                                     | 7.82           | 2.13            |
| 17-Dec-14      | 1.44                    | 6.02          | 2.87        | 1.75                     | 3.29         | 2.50        | 0.00                                     | 6.36           | 2.44            |
| 18-Dec-14      | 1.25                    | 6.52          | 2.88        | 1.44                     | 4.01         | 2.70        | 0.00                                     | 7.20           | 2.22            |
| 19-Dec-14      | 1.75                    | 6.52          | 2.93        | 1.66                     | 4.01         | 2.89        | 0.00                                     | 8.24           | 2.86            |
| 20-Dec-14      | 1.75                    | 6.32          | 3.22        | 1.75                     | 3.81         | 2.26        | 0.00                                     | 6.16           | 2.39            |
| 21-Dec-14      | 1.66                    | 11.20         | 2.99        | 1.75                     | 3.95         | 2.83        | 0.00                                     | 6.36           | 1.90            |
| 22-Dec-14      | 1.60                    | 6.52          | 3.40        | 1.75                     | 3.95         | 2.59        | 0.00                                     | 7.20           | 1.91            |
| 23-Dec-14      | 1.70                    | 6.32          | 3.39        | 1.75                     | 4.50         | 2.95        | 0.00                                     | 7.20           | 2.05            |
| 24-Dec-14      | 1.70                    | 6.12          | 3.37        | 1.70                     | 4.84         | 3.07        | 0.00                                     | 6.16           | 2.32            |
| 25-Dec-14      | 1.72                    | 6.52          | 3.39        | 1.70                     | 4.60         | 3.01        | 0.00                                     | 8.24           | 2.62            |
| 26-Dec-14      | 1.70                    | 6.52          | 3.66        | 1.85                     | 4.08         | 2.85        | 0.00                                     | 8.24           | 2.80            |
| 27-Dec-14      | 1.70                    | 6.52          | 3.63        | 1.70                     | 4.87         | 3.06        | 0.00                                     | 7.20           | 2.10            |
| 28-Dec-14      | 1.60                    | 6.52          | 3.37        | 1.75                     | 4.12         | 2.84        | 0.00                                     | 8.03           | 1.63            |
| 29-Dec-14      | 1.66                    | 6.52          | 3.68        | 1.74                     | 4.50         | 3.03        | 0.00                                     | 8.24           | 1.54            |
| 30-Dec-14      | 1.69                    | 6.82          | 3.66        | 1.70                     | 4.84         | 2.90        | 0.00                                     | 8.24           | 2.19            |
| 31-Dec-14      | 1.70                    | 5.83          | 3.76        | 1.70                     | 4.60         | 2.64        | 0.00                                     | 7.20           | 1.54            |
|                | <b>1.10#</b>            | <b>20.00#</b> | <b>3.20</b> | <b>1.33#</b>             | <b>4.87#</b> | <b>2.85</b> | <b>0.00#</b>                             | <b>8.24#</b>   | <b>1.84</b>     |

Source: Data on price of PX transactions from IEX and PXIL and data on UI Price from NLDC.

\* Weighted average price computed based on Area Clearing Volume (ACV) and Area Clearing Price (ACP) for each hour of the day. Here, ACV and ACP represent the scheduled volume and weighted average price of all the bid areas of power exchanges.

\*\* Simple average price of UI of 96 time blocks of 15 minutes each in a day. UI price includes Ceiling UI Rate +40% additional UI charge.

# Maximum/Minimum in the month

**Table-19: VOLUME OF SHORT-TERM TRANSACTIONS OF ELECTRICITY (REGIONAL ENTITY\*-WISE) (MUs), DECEMBER 2014**

| Name of the State/UT/Other Regional Entity | Through Bilateral |          |         | Through Power Exchange |          |         | Through UI with Regional Grid |                     |         | Total Net*** |
|--------------------------------------------|-------------------|----------|---------|------------------------|----------|---------|-------------------------------|---------------------|---------|--------------|
|                                            | Sale              | Purchase | Net**   | Sale                   | Purchase | Net**   | Export (Under Drawl)          | Import (Over Drawl) | Net**   |              |
| Punjab                                     | 321.47            | 0.00     | -321.47 | 0.00                   | 38.57    | 38.57   | 44.89                         | 93.59               | 48.70   | -234.19      |
| Haryana                                    | 916.34            | 207.99   | -708.35 | 4.83                   | 80.01    | 75.18   | 101.62                        | 38.06               | -63.55  | -696.73      |
| Rajasthan                                  | 112.93            | 603.39   | 490.46  | 66.50                  | 388.59   | 322.10  | 54.94                         | 79.03               | 24.10   | 836.65       |
| Delhi                                      | 438.87            | 19.78    | -419.09 | 20.03                  | 167.49   | 147.45  | 67.49                         | 21.57               | -45.93  | -317.57      |
| Uttar Pradesh                              | 74.51             | 111.75   | 37.24   | 0.00                   | 6.43     | 6.43    | 133.80                        | 48.20               | -85.60  | -41.92       |
| Uttarakhand                                | 0.00              | 162.02   | 162.02  | 5.30                   | 291.68   | 286.38  | 19.45                         | 35.26               | 15.82   | 464.21       |
| Himachal Pradesh                           | 37.34             | 414.11   | 376.77  | 102.89                 | 6.73     | -96.16  | 17.00                         | 24.99               | 7.99    | 288.59       |
| J & K                                      | 12.89             | 379.30   | 366.41  | 11.53                  | 63.05    | 51.53   | 5.44                          | 79.63               | 74.19   | 492.13       |
| UT Chandigarh                              | 7.44              | 0.00     | -7.44   | 0.01                   | 7.02     | 7.01    | 1.82                          | 16.86               | 15.04   | 14.61        |
| MP                                         | 38.08             | 548.93   | 510.85  | 113.18                 | 64.40    | -48.77  | 65.97                         | 39.05               | -26.92  | 435.15       |
| Maharashtra                                | 0.00              | 355.03   | 355.03  | 144.43                 | 119.25   | -25.18  | 193.98                        | 21.02               | -172.95 | 156.90       |
| Gujarat                                    | 286.89            | 20.10    | -266.79 | 135.93                 | 245.79   | 109.85  | 68.85                         | 66.34               | -2.51   | -159.45      |
| Chattisgarh                                | 113.27            | 3.72     | -109.55 | 156.49                 | 9.36     | -147.13 | 30.37                         | 33.93               | 3.55    | -253.13      |
| Daman and Diu                              | 0.00              | 0.00     | 0.00    | 0.00                   | 31.26    | 31.26   | 4.97                          | 1.37                | -3.60   | 27.66        |
| Dadra & Nagar Haveli                       | 0.00              | 0.00     | 0.00    | 0.00                   | 0.00     | 0.00    | 4.31                          | 3.37                | -0.94   | -0.94        |
| Andhra Pradesh                             | 0.00              | 476.98   | 476.98  | 40.63                  | 74.77    | 34.14   | 17.10                         | 43.38               | 26.28   | 537.40       |
| Karnataka                                  | 314.75            | 0.00     | -314.75 | 159.34                 | 49.74    | -109.60 | 10.66                         | 70.58               | 59.91   | -364.43      |
| Kerala                                     | 0.00              | 94.62    | 94.62   | 2.75                   | 162.27   | 159.51  | 1.44                          | 80.79               | 79.35   | 333.48       |
| Tamilnadu                                  | 0.00              | 32.96    | 32.96   | 0.00                   | 37.66    | 37.66   | 76.03                         | 16.79               | -59.24  | 11.39        |
| Pondicherry                                | 0.00              | 0.00     | 0.00    | 0.00                   | 0.00     | 0.00    | 5.30                          | 2.92                | -2.38   | -2.38        |
| Telangana                                  | 12.82             | 329.38   | 316.56  | 30.72                  | 76.60    | 45.88   | 9.94                          | 73.70               | 63.76   | 426.20       |
| West Bengal                                | 277.29            | 30.47    | -246.83 | 51.05                  | 59.03    | 7.98    | 13.79                         | 62.34               | 48.55   | -190.29      |
| Orissa                                     | 58.41             | 97.96    | 39.55   | 26.10                  | 0.91     | -25.19  | 12.65                         | 75.28               | 62.63   | 76.99        |
| Bihar                                      | 0.00              | 216.66   | 216.66  | 1.06                   | 5.55     | 4.49    | 89.97                         | 21.96               | -68.01  | 153.15       |
| Jharkhand                                  | 0.00              | 113.11   | 113.11  | 0.00                   | 0.00     | 0.00    | 15.09                         | 20.30               | 5.21    | 118.32       |
| Sikkim                                     | 0.00              | 2.88     | 2.88    | 16.82                  | 0.00     | -16.82  | 10.82                         | 0.87                | -9.95   | -23.90       |
| DVC                                        | 50.90             | 0.00     | -50.90  | 58.99                  | 0.00     | -58.99  | 24.90                         | 30.43               | 5.53    | -104.35      |
| Arunachal Pradesh                          | 0.00              | 0.00     | 0.00    | 0.00                   | 10.01    | 10.01   | 0.12                          | 20.59               | 20.48   | 30.49        |
| Assam                                      | 0.00              | 5.86     | 5.86    | 2.61                   | 24.37    | 21.76   | 3.90                          | 25.73               | 21.84   | 49.45        |
| Manipur                                    | 1.12              | 17.31    | 16.19   | 5.97                   | 10.04    | 4.07    | 2.52                          | 5.67                | 3.15    | 23.41        |
| Meghalaya                                  | 0.00              | 40.84    | 40.84   | 0.00                   | 34.13    | 34.13   | 3.92                          | 4.90                | 0.98    | 75.96        |
| Mizoram                                    | 0.00              | 1.30     | 1.30    | 1.20                   | 0.00     | -1.20   | 0.10                          | 10.04               | 9.94    | 10.04        |
| Nagaland                                   | 0.00              | 10.89    | 10.89   | 0.00                   | 1.47     | 1.47    | 0.07                          | 11.29               | 11.22   | 23.58        |
| Tripura                                    | 2.62              | 0.00     | -2.62   | 50.31                  | 0.00     | -50.31  | 1.13                          | 16.02               | 14.89   | -38.03       |
| Goa                                        | 0.30              | 29.14    | 28.84   | 20.03                  | 3.10     | -16.93  | 14.57                         | 12.22               | -2.35   | 9.55         |
| NHPC Stations                              | 0.00              | 0.00     | 0.00    | 0.00                   | 0.00     | 0.00    | 26.36                         | 4.75                | -21.61  | -21.61       |
| NJPC                                       | 0.00              | 0.00     | 0.00    | 4.95                   | 0.00     | -4.95   | 5.49                          | 1.53                | -3.96   | -8.91        |

|                   |        |      |         |        |        |         |       |       |       |         |
|-------------------|--------|------|---------|--------|--------|---------|-------|-------|-------|---------|
| AD HYDRO          | 0.22   | 1.00 | 0.79    | 14.27  | 0.00   | -14.27  | 0.57  | 0.91  | 0.33  | -13.15  |
| KARCHAM WANGTOO   | 0.27   | 0.00 | -0.27   | 62.18  | 0.00   | -62.18  | 5.02  | 2.79  | -2.24 | -64.68  |
| SHREE CEMENT      | 110.53 | 0.00 | -110.53 | 25.74  | 0.00   | -25.74  | 1.66  | 5.05  | 3.38  | -132.89 |
| LANCO BUDHIL      | 0.00   | 0.00 | 0.00    | 2.55   | 0.00   | -2.55   | 0.00  | 0.00  | 0.00  | -2.55   |
| MALANA            | 0.00   | 0.00 | 0.00    | 0.39   | 0.00   | -0.39   | 0.00  | 0.00  | 0.00  | -0.39   |
| JINDAL POWER      | 329.00 | 0.00 | -329.00 | 91.46  | 0.00   | -91.46  | 14.58 | 6.90  | -7.68 | -428.13 |
| LANKO_AMK         | 0.00   | 0.00 | 0.00    | 0.00   | 0.00   | 0.00    | 2.99  | 1.12  | -1.87 | -1.87   |
| NSPCL             | 0.00   | 0.00 | 0.00    | 0.00   | 0.00   | 0.00    | 1.52  | 2.14  | 0.62  | 0.62    |
| ACBIL             | 9.80   | 0.00 | -9.80   | 37.65  | 0.00   | -37.65  | 3.36  | 6.58  | 3.21  | -44.23  |
| BALCO             | 0.00   | 0.00 | 0.00    | 0.00   | 30.28  | 30.28   | 1.31  | 5.72  | 4.41  | 34.69   |
| RGPPL(Dabhol)     | 0.00   | 0.00 | 0.00    | 0.00   | 0.00   | 0.00    | 0.04  | 6.41  | 6.37  | 6.37    |
| CGPL              | 0.00   | 0.00 | 0.00    | 0.00   | 0.00   | 0.00    | 10.90 | 17.00 | 6.10  | 6.10    |
| DCPP              | 0.06   | 0.00 | -0.06   | 165.83 | 0.00   | -165.83 | 4.30  | 4.30  | 0.00  | -165.88 |
| EMCO              | 0.00   | 0.00 | 0.00    | 27.24  | 0.00   | -27.24  | 0.00  | 0.00  | 0.00  | -27.24  |
| VANDANA VIDYUT    | 0.00   | 0.00 | 0.00    | 13.07  | 0.00   | -13.07  | 0.00  | 0.00  | 0.00  | -13.07  |
| ESSAR STEEL       | 0.00   | 0.00 | 0.00    | 0.00   | 100.48 | 100.48  | 0.00  | 0.00  | 0.00  | 100.48  |
| DHARIWAL POWER    | 0.00   | 0.00 | 0.00    | 26.06  | 0.00   | -26.06  | 0.00  | 0.00  | 0.00  | -26.06  |
| JAYPEE NIGRIE     | 0.00   | 0.00 | 0.00    | 129.72 | 0.00   | -129.72 | 0.00  | 0.00  | 0.00  | -129.72 |
| SIMHAPURI         | 262.61 | 0.00 | -262.61 | 19.85  | 0.00   | -19.85  | 1.40  | 4.30  | 2.89  | -279.56 |
| Meenakshi         | 0.00   | 0.99 | 0.99    | 29.81  | 0.00   | -29.81  | 0.00  | 0.00  | 0.00  | -28.82  |
| STERLITE          | 208.26 | 0.00 | -208.26 | 151.46 | 0.00   | -151.46 | 7.76  | 18.97 | 11.21 | -348.51 |
| MAITHON POWER LTD | 20.26  | 0.00 | -20.26  | 53.64  | 0.00   | -53.64  | 8.32  | 4.33  | -3.99 | -77.89  |
| ADHUNIK POWER LTD | 0.00   | 0.00 | 0.00    | 0.41   | 0.00   | -0.41   | 0.00  | 0.00  | 0.00  | -0.41   |
| CHUZACHEN HEP     | 0.00   | 0.00 | 0.00    | 12.66  | 0.00   | -12.66  | 0.00  | 0.00  | 0.00  | -12.66  |
| RANGIT HEP        | 0.00   | 0.00 | 0.00    | 3.65   | 0.00   | -3.65   | 0.00  | 0.00  | 0.00  | -3.65   |
| GMR KAMALANGA     | 0.00   | 0.00 | 0.00    | 61.67  | 0.00   | -61.67  | 0.00  | 0.00  | 0.00  | -61.67  |
| TEESTA HEP        | 0.00   | 0.00 | 0.00    | 7.97   | 0.00   | -7.97   | 0.00  | 0.00  | 0.00  | -7.97   |
| NEEPCO Stations   | 0.00   | 0.00 | 0.00    | 1.30   | 0.00   | -1.30   | 5.54  | 1.46  | -4.08 | -5.39   |
| ONGC PALATANA     | 0.00   | 0.00 | 0.00    | 27.81  | 0.00   | -27.81  | 0.00  | 0.00  | 0.00  | -27.81  |

Source: NLDC

\* in case of a state, the entities which are "selling" also include generators connected to state grid and the entities which are "buying" also include open access consumers.

\*\* (-) indicates sale and (+) indicates purchase,

\*\*\* Total net includes net of transactions through bilateral, power exchange and UI

**Figure 7: Bilateral Contracts executed by Traders in January, 2015**

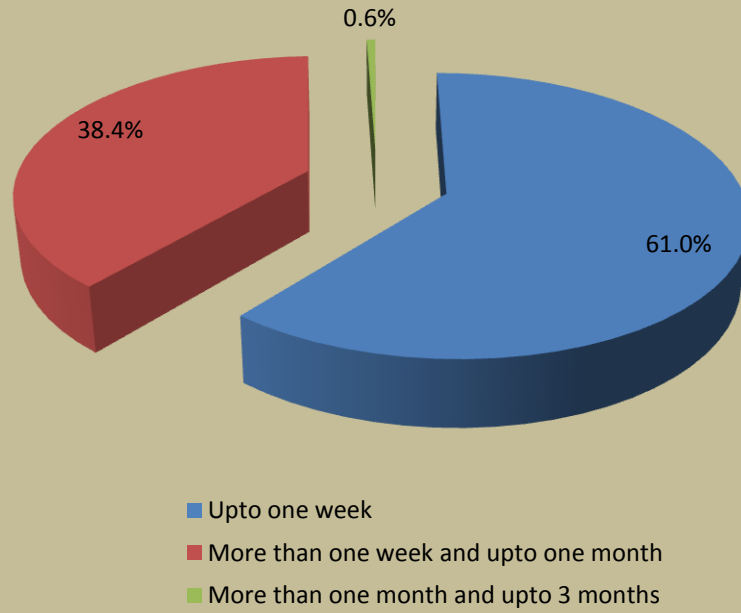

**Figure-8: Forward Curve based on Prices of Bilateral Contracts**

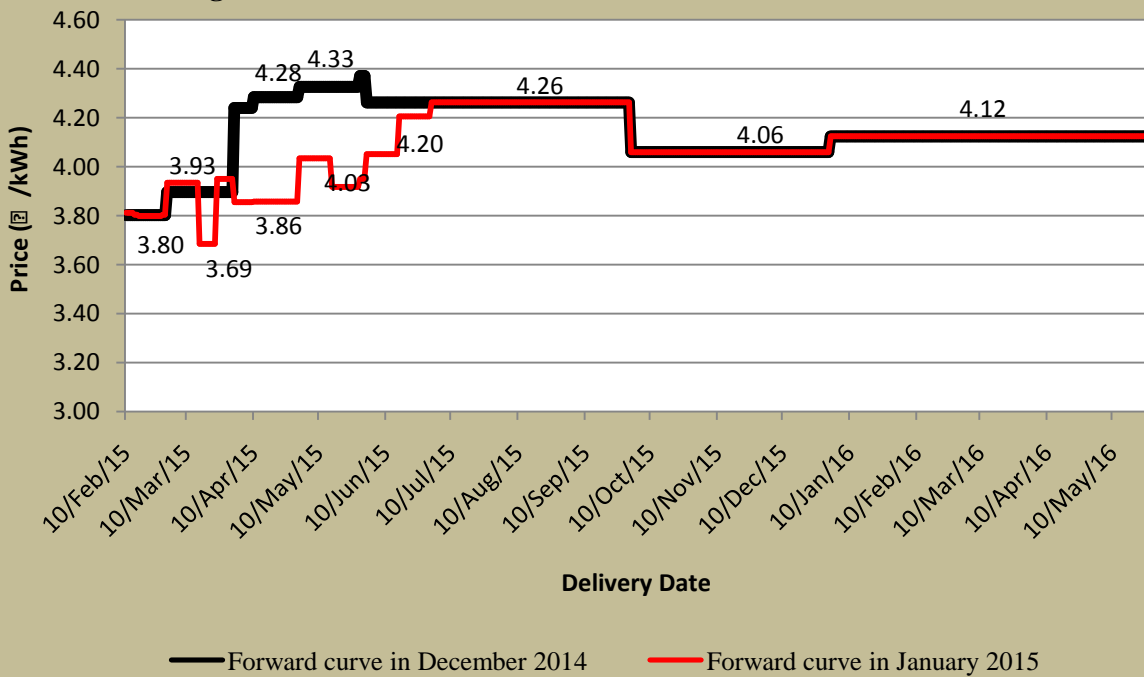



| Table-20 : VOLUME AND PRICE OF RENEWABLE ENERGY CERTIFICATES (RECs)<br>TRANSACTIONED THROUGH POWER EXCHANGES, DECEMBER 2014 |                                        |        |           |        |           |
|-----------------------------------------------------------------------------------------------------------------------------|----------------------------------------|--------|-----------|--------|-----------|
| Sr.No.                                                                                                                      | Details of REC Transactions            | IEX    |           | PXIL   |           |
|                                                                                                                             |                                        | Solar  | Non-Solar | Solar  | Non Solar |
| A                                                                                                                           | Volume of Buy Bid                      | 366    | 177960    | 1693   | 157763    |
| B                                                                                                                           | Volume of Sell Bid                     | 235972 | 5313974   | 325523 | 5681333   |
| C                                                                                                                           | Ratio of Buy Bid to Sell Bid<br>Volume | 0.002  | 0.03      | 0.005  | 0.03      |
| D                                                                                                                           | Market Clearing Volume (MWh)           | 366    | 177960    | 1693   | 157763    |
| E                                                                                                                           | Market Clearing Price (₹/MWh)          | 9300   | 1500      | 9300   | 1500      |

Source: IEX and PXIL

Note 1: 1 REC = 1 MWh

Note 2:

| <i>Forbearance and Floor Price w.e.f 1st April 2012</i> |                                |                                          |
|---------------------------------------------------------|--------------------------------|------------------------------------------|
| Type of REC                                             | <i>Floor Price<br/>(₹/MWh)</i> | <i>Forbearance<br/>Price<br/>(₹/MWh)</i> |
| <i>Solar</i>                                            | <i>9300.00</i>                 | <i>13400.00</i>                          |
| <i>Non-Solar</i>                                        | <i>1500.00</i>                 | <i>3300.00</i>                           |
